# Supplementary material for: The Complete Genome of Probiotic Lactobacillus sakei Derived from Plateau Yak Feces
Source: MDPI journal article supplement (doi:10.3390/genes11121527), 2020-12-21
Supplement: s1 [file s1]

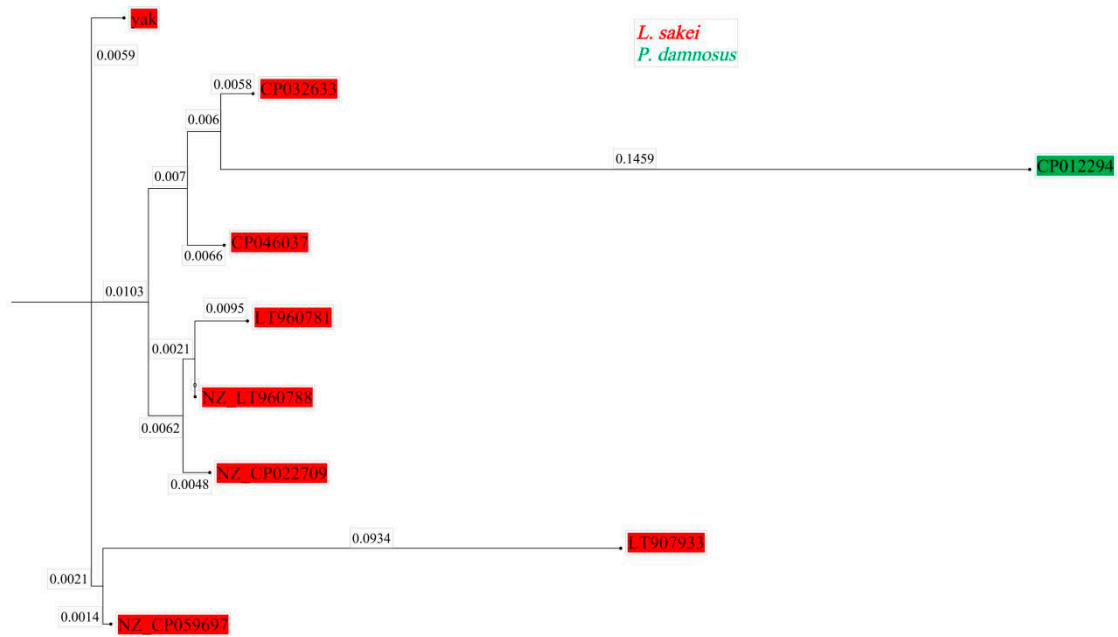

**Figure S1.** Phylogenetic tree of the *L. sakei* yak isolate and references strains. The tree was constructed using software MEGA 6.0 by the neighbor-joining method, based on whole genome sequences with 1000 replications in bootstrap testing.
